# COVID-19 mortality: positive correlation with cloudiness and sunlight but no correlation with latitude in Europe

S. OMER<sup>1,2\*</sup>, A. IFTIME<sup>1\*</sup>, V. BURCEA<sup>1</sup>

1) University of Medicine and Pharmacy "Carol Davila", Biophysics Dept., 8 Eroii Sanitari Blvd., 050474 Bucharest, Romania. ORCID: 0000-0002-5987-1789

2) "St. Ioan" Emergency Hospital, 13 Vitan Barzesti Str., 042122 Bucharest, Romania

\* These authors contributed equally

## Corresponding author:

A. Iftime

University of Medicine and Pharmacy "Carol Davila",

Biophysics Department, 8 Blvd. Eroii Sanitari, 050474 Bucharest, Romania.

Email address: [adrian.iftime\[at\]umfcd.ro](mailto:adrian.iftime[at]umfcd.ro)

## *Abstract*

*We systematically investigated an ongoing debate about the possible correlation between SARS-CoV-2 (COVID-19) epidemiological outcomes and solar exposure in European countries, in the period of March – August 2020. For each country, we correlated its mortality data with solar insolation (watt/square metre) and objective sky cloudiness (as cloud fraction) derived from satellite weather data. We found a positive correlation between the monthly mortality rate and the overall cloudiness in that month (Pearson's  $r(35)=.779$ ,  $P<.001$ ; linear model fitting the data, adjusted  $R^2 =0.59$ ). In Europe, in colder months, approximately 34% to 58% of the variance in COVID-19 mortality/million appears to be predicted by the cloudiness fraction of the sky, except in August in which only ~15% of the variance was explained. The data show a low, negative correlation between the mortality rate with the overall insolation received by the country area in that entire month (Pearson's  $r(35)=-0.622$ ,  $P<.001$ ). Additionally, we did not find any statistically significant correlation between the mortality and the latitude of the countries when the "latitude of a country" was precisely defined as the average landmass location (country centroid). The unexpected correlation found between cloudiness and mortality could perhaps be explained by the following: 1) heavy cloudiness is linked with colder outdoor surfaces, which might aid virus survival; 2) reduced evaporation rate; 3) moderate pollution may be linked to both cloudiness and mortality; and 4) large-scale behavioural changes due to cloudiness (which perhaps drives people to spend more time indoors and thus facilitates indoor contamination).*

## Introduction

This study explores the influence of previously ignored climatological factors (objective cloudiness and solar irradiation) on SARS-CoV-2 (COVID-19) mortality in Europe.

The factors that might influence the spread and impact of COVID-19 have recently been extensively discussed in the media and in research articles. Coronaviruses spread in the population due to a combination of medical, biological and socio-economic factors. It has also been suggested that latitude [1,2] and climate (temperature, humidity [3,4]) significantly contribute to COVID-19 spread.

A copious amount of (mainly local) studies (some not yet peer-reviewed) on climatic influence on COVID-19 has been released, with mixed or contradictory results. The World Meteorological Organization even hosted an international virtual symposium on the issue to deal with these uncertainties (“Climatological, Meteorological and Environmental factors on COVID-19 pandemic”, 4-6 August 2020).

Initially, (March – April 2020), the transmission of COVID-19 seemed to be associated with the 30- to 50-degree North longitude corridor and weather patterns and low specific and absolute humidity [2]; however this could just as plausibly reflect trade and human movement patterns in the Northern hemisphere. Late in the spring of 2020, tropical and subtropical countries began to see an increase of pandemic transmission, and the latitude dependency thus appears to be unsure at this point.

It has also been previously noted that COVID-19 had a higher impact in countries where epidemiological data had shown a degree of vitamin D deficiency in the population [1]. Vitamin D has a wide range of immunomodulatory, anti-inflammatory and antioxidant properties, and it thus seems (presumably) protective. In vivo vitamin D synthesis is photochemically dependent in humans, and its concentration levels drop without sufficient sunlight exposure. As the latitude increases, the amount of locally received sunlight generally decreases. These two facts were combined by other researchers in a range of compelling clinical hypotheses linking susceptibility to COVID-19 to vitamin D and indirectly to lack of sunlight exposure or increased latitude (see for example [5] or [6] for a more thorough perspective on these issues and [7] for a biochemical study).

In sharp contrast to the above hypotheses, other biochemical studies have not to found a correlation between vitamin D and COVID-19 epidemiological data (see [8] or [9]). These studies concluded that other unknown factors might be at play.

We tried to address these contradictions from an analytical, biophysical point of view: the amount of UV radiation that reaches the ground (and is thus presumably protective) is a fraction of total sunlight (which also contains visible light and infrared radiation). The total sunlight (known also as “solar insolation” or “solar irradiance at ground level”) is defined as the flux of solar radiation per unit of horizontal area for a given location. It depends on several factors: primarily on solar zenith angle (which depends on latitude), secondarily on atmospheric composition (via absorption and scattering), and thirdly on seasonal change (due to the Earth's axial tilt). These are well known and researched topics; see for example [10] for an extensive review. Solar irradiance is one of the main factors that determine the temperature

at ground level (with an almost linear dependence [11]), along with humidity (by inducing water evaporation and soil dryness) and the climate in general [12]). Solar irradiance is expressed in watts/square metre.

Solar irradiance at ground level is heavily influenced by atmospheric composition, primarily by clouds [13] and secondarily by other factors such as dust, pollutants, and humidity [14]. Clouds exert a complex influence: by reflection of the sunlight (back into space) they reduce the amount of total energy that reaches the earth but by scattering they can counterintuitively direct some of the energy back to land, especially in the UV portion of the spectrum, thus modulating the biologically effective radiation dose received by living things [15].

In this study, we present detailed research on the direct influence on COVID-19 mortality in European countries of the above-discussed factors: a) sky cloudiness, b) solar irradiance and c) latitude. Our results show that there is a sizeable influence due to cloudiness, a smaller influence due to absolute amount of sunlight, and basically no influence due to latitude.

## Methods

### 1. Datasets

#### *Epidemiological data*

Different epidemiological variables about COVID-19 epidemics are collected and reported around the world. We used the “Coronavirus update”, a publicly available epidemiological database summarized by Worldometers [16]; monthly data snapshots of it were retrieved from the Internet Archive Organization [17]. From this database we extracted the mortality, defined as the number of deaths per 1 million inhabitants in a given country in a particular month. There are two issues with this approach that might impact our study. First, there are legal and practical differences among countries regarding death recording and reporting [18]. The COVID-19 database we used records the deaths as reported by local authorities; we could not quantitatively assess the differences between the countries, which could impact comparison of different countries. Second, the time lag between the actual death and the reported time could be different for each case; the monthly intervals analysed probably average most of the differences.

#### *Atmospheric cloudiness data*

Cloudiness (also known as cloud fraction, cloud cover, cloud amount or sky cover) refers to the fraction of the sky obscured by clouds (in a particular location). It can be reported in various units. In this study, we used the cloud fraction (as tenths of the entire sky); 0.0 thus indicates a clear sky and 1.0 (or 10/10) indicates a completely covered sky.

We used a publicly available dataset of global cloudiness as measured from space by NASA's Terra and Aqua satellites using the MODIS instrument (Moderate Resolution Imaging Spectroradiometer) [19]. This dataset is collected continuously and presented as values averaged daily, weekly and monthly for the entire globe; for this study we chose the monthly averaged values.

In this dataset the entire Earth surface is divided into a rectangular grid. Each rectangle of the grid contains the average cloud fraction of the sky covering that area. The data are available at different resolutions (sizes of the rectangular grid that covers the Earth). We chose a fairly detailed resolution of the grid,  $0.25^\circ$  latitude x  $0.25^\circ$  longitude. We ensured that the other geographical datasets that we used in this study matched the same spatial resolution.

#### *Solar data*

The average solar insolation (also known as solar irradiance, solar exposure, incoming sunlight) in watts/square metre at the Earth's surface was used in this study. We used a publicly available dataset inferred from measurements taken by Clouds and Earth's Radiant Energy System (CERES) instrument flying aboard NASA's Terra and Aqua satellites [20]. We used the same temporal and spatial sampling as presented above, i.e., monthly averaged values over a  $0.25^\circ$  latitude x  $0.25^\circ$  longitude grid.

#### *Geographical data*

For a single point on the Earth, the geographical coordinates are straightforward (latitude and longitude). However, for a country (or large region) the coordinates can be represented in several distinct ways, each with pros and cons, such as the location of the capital city, the location of the most populated city, the average between the most extreme points of the country, and the country centroid, among others.

As the “latitude of a country” measure, we used the country centroid. A centroid (also known as the centre of gravity or centre of mass) is the arithmetic mean of the positions of all the points in a geometrical object; for irregular objects, it is closest to the centre of the biggest part of the object (it is less influenced by very thin or heavily scattered boundaries). We chose this measure because several countries have highly irregular geometrical boundaries or long thin peninsulas or numerous islands (i.e., Greece, Norway, etc.); the country centroid is located closer to the widest area of the mainland. We used a standard database of countries centroids published by Google Maps developers [21].

As the “country boundary” measure we chose to use a simplified representation of the country border, the country bounding box, which is a rectangle on the surface of the Earth with North and South edges corresponding to the limiting (max and min) latitudes of the country and West and East edges corresponding to the limiting longitudes. We used a database of bounding boxes of all countries published by the Center of Humanitarian Data [22].

We are aware that the use of the country bounding box simplification can induce a degree of imprecision (smoothing) or overlapping errors. To minimize these errors, we carefully curated the bounding box coordinates to exclude non-mainland portions. We did this because we wanted to restrict the analysis to the land portion of Europe (for example, overseas remote islands such as Svalbard would include almost 600 sq km of Arctic Ocean surface in Norway's geographical definition). We checked this by comparing the centroid location of each country with the average geometric centre of its bounding box, making sure that the error was less than 1 degree of longitude or latitude.

#### *Inclusion and exclusion criteria*

The inclusion criteria were as follows: a) all countries on the European continent; b) availability of epidemiological and geographical (cloudiness, insolation) data.

The exclusion criteria were as follows: a) population < 0.5 million and b) a geographical bounding box of the country smaller than  $0.25^\circ$  latitude  $\times$   $0.25^\circ$  longitude. We used these criteria because European micro-states (Monaco, Vatican, San Marino, etc.) were too small to be properly sampled from the available resolution of geospatial data (insolation, cloudiness).

Russia was also excluded from analysis because the COVID-19 epidemiological data from the country was available only in an aggregate form (i.e., no data were available detailing the epidemiology in European and Asian parts of Russia).

In this way we obtained a list of 37 European countries (listed alphabetically): Albania, Austria, Belarus, Belgium, Bosnia and Herzegovina, Bulgaria, Croatia, Czech Republic, Denmark, Estonia, Finland, France, Germany, Greece, Hungary, Ireland, Italy, Latvia, Lithuania, Luxembourg, Malta, Moldova, Montenegro, Netherlands, North Macedonia, Norway, Poland, Portugal, Romania, Serbia, Slovakia, Slovenia, Spain, Sweden, Switzerland, United Kingdom (UK) and Ukraine.

For each of these countries and for each month in the studied interval (March – August 2020), we included in the analysis the following variables: COVID-19 mortality (deaths per 1 million population), insolation averaged for 1 month across the country (measured in Watt/m<sup>2</sup>), the cloud fraction averaged for 1 month across the country (expressed as a fraction between 0.0 ... 1.0) and the latitude of the countries. The aggregated results for each country are presented in the Supplementary materials, Figures S.1, S.2 and S.3)

## 2. Software used

*We performed basic epidemiological data gathering in tabular sheets (Excel/LibreOffice Calc). We performed data analysis and visualization in R version 4.0.2 [23], with packages tidyverse [24], ggplot [25], stargazer [26]; geospatial data was analysed with raster [27].*

## 3. Calculation

Most of the European countries reported the first deaths in March 2020 (see Supplementary material, Figure S.1), and we used this month as the starting point for our analysis.

We employed multiple linear regression models with mortality as the response (it is log<sub>10</sub> transformed in all the following analyses and figures). As predictor variables we used cloud fraction and solar insolation, both averaged (for the March – August interval). For each one of the reported models we checked their validity by analysing the normality of the residuals as follows: normal Q-Q plot, presence of outliers, and homogeneity of the variance of residuals (we assumed homoscedasticity if the result of the studentized Breusch-Pagan test was bigger than 0.05). We attempted a brief time-series analysis of the factors; we checked the distribution of the data in time and the autocorrelation of the disturbances with a Durbin-Watson test.

## Results

### 1. Overall Mortality vs. Cloudiness

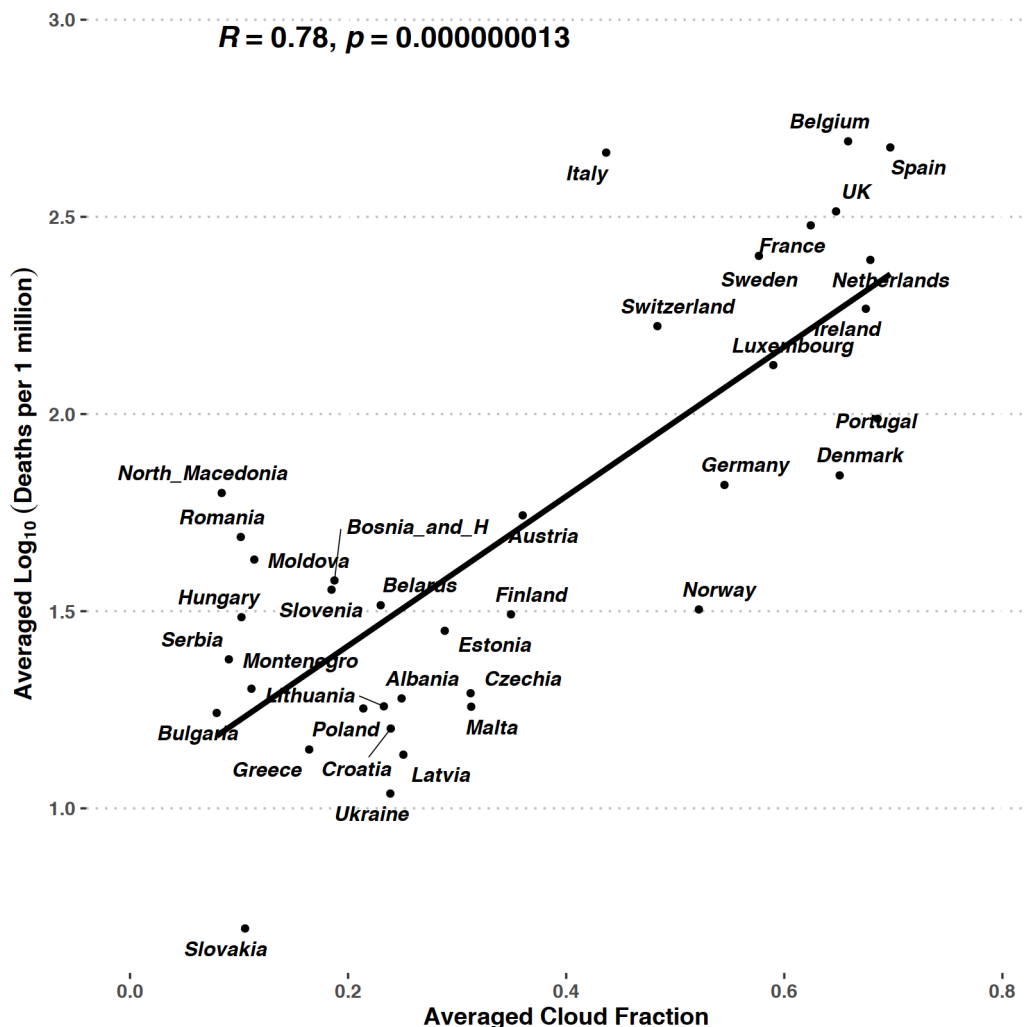

Figure 1. Overall correlation between mortality and cloudiness.

The data points are the averaged values for each one of the European countries included in the study during March – August 2020. Cloudiness is expressed as the cloud fraction, ranging between 0.0 (completely sunny sky) and 1.0 (clouds completely obscure the sun).

For each country, in the interval March – August 2020, we averaged the monthly cloudiness and the monthly mortality rate, and we built a linear model (Figure 1). It shows a modest but statistically significant correlation between the average mortality rate and the average sky cloudiness (Pearson's  $r(35) = .779$ ,  $P < .001$ ).

The linear model that fits the data shown in Figure one is presented in Table 1. In continental Europe, from the beginning of the epidemic, approximately 59% of the variance in COVID-19 mortality/million appears to be predicted by the cloudiness fraction of the sky. The model passes the quality criteria listed in the Calculation section, and the residuals of the model

appear to be homoscedastic, Breusch-Pagan test P-value=0.893).

## 2. Overall Mortality vs. Insolation

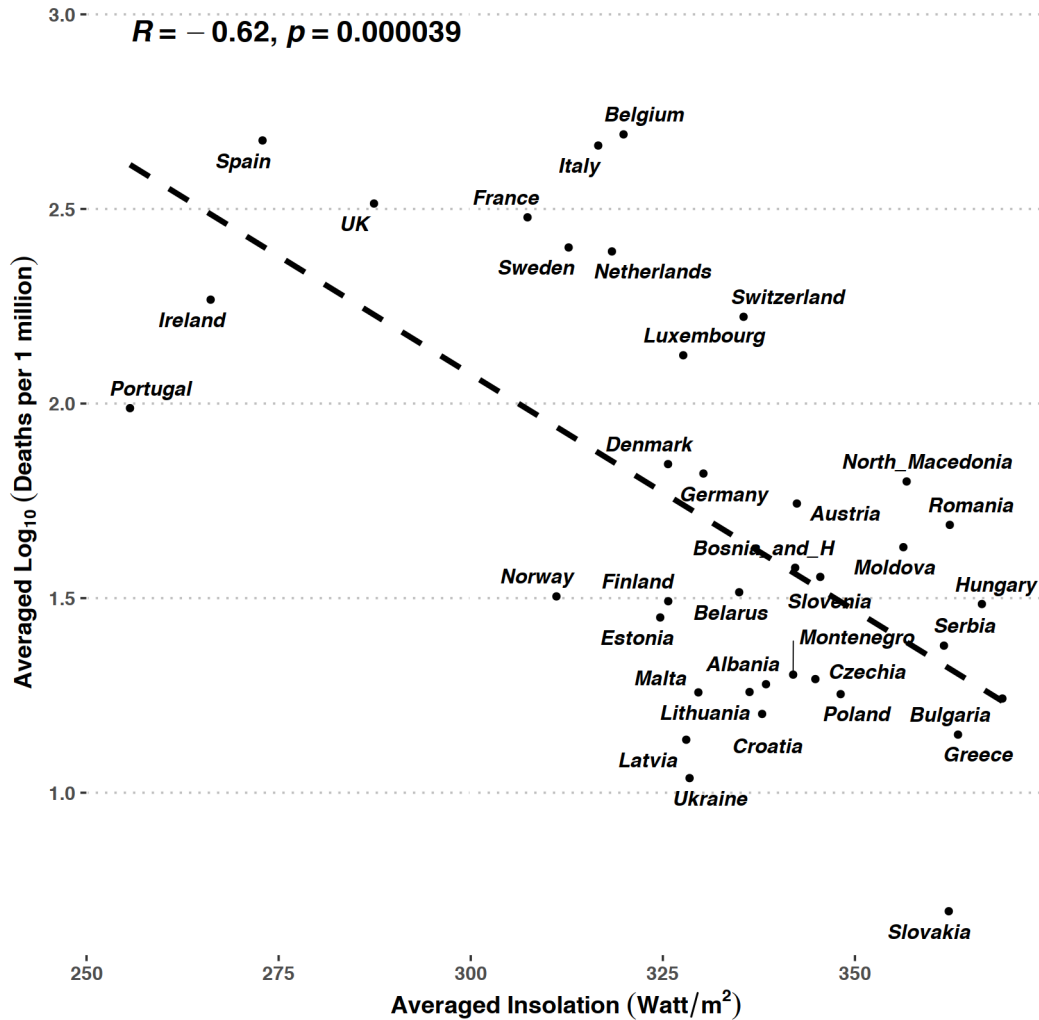

Figure 2. Overall correlation between averaged mortality and averaged insolation (solar irradiance). The data points are the averaged values for all European countries included in the study during March – July 2020. The dashed line represents the apparently good-fitting linear model, although this model is not valid upon close inspection (see text). We included it as a guide for the eye.

The dataset shows a low, negative correlation between the mortality rate (evaluated at the end of a month) and the overall insolation received by the country area in that entire month (Pearson's  $r(35)=-0.622, P<.001$ ). Note that some of the data points are missing (for the month of August 2020 the solar irradiance data were not yet available at the time of writing).

The linear model that fit this dataset explains only approximately 37% of the variance of the data; the regression model did not hold after a close inspection of the distribution of residuals. It passed the Breusch-Pagan test ( $P=0.11$ ), but the analysis of the residuals vs. leverage

revealed some issues with the model: Portugal is a high leverage point (with a high Cook's distance); its exclusion from the analysis would significantly change the model. Quantile-quantile (Q-Q) plot analysis indicates that both Portugal and Belgium have more extreme values that would be expected from the rest of the data points. We plotted the regression line in Figure 2 for the completeness of the graphic. This seems to strongly suggest that there are some highly divergent confounding factors in this regression model of mortality vs. insolation.

As we noted in the Introduction, it is well known that the solar irradiance at the ground level is primarily influenced by clouds and secondarily by other factors. We verified that this fact is indeed true in the analysed dataset: the insolation vs. cloud fraction has Pearson's  $r(183)=-0.804$ ,  $P<0.001$ , and the adjusted  $R^2=0.654$ , for all the raw data points. Similar results were obtained if we analysed the averaged data for each country over the March–August interval: Pearson's  $r(35)=-0.838$ ,  $P<0.001$ , adjusted  $R^2=0.695$ . The other confounding factors that influenced the variation are unknown, and we tried to address some of the possibilities in the Discussion section. A combined model of mortality vs. cloudiness and insolation (with or without interaction) did not significantly change the above results.

### 3. Time-series analysis

We also wanted to make sure that the above results were not the result of chronological influence over the chosen factors. As a preliminary check, we verified the independent variation in time of these variables; these are reported in Supplementary material, Figures S.4 – S.6. The overall mortality rate (Figure S.4) increases continuously. The cloudiness seem to be randomly distributed with no discernible pattern in the 6-month interval analysed (Figure S.5); this is expected because the seasonal temporal variability in the cloud cover is usually  $\sim 30\%$ , with bigger differences between extreme seasons [28]. The average solar insolation in European countries month-by-month (Figure S.6) follows the expected sinusoidal pattern due to seasonal changes [10].

After these checks we verified the correlations of these factors (cloud fraction, insolation) with mortality at monthly intervals (Figure 3).



*Mortality vs. Cloudiness over time*

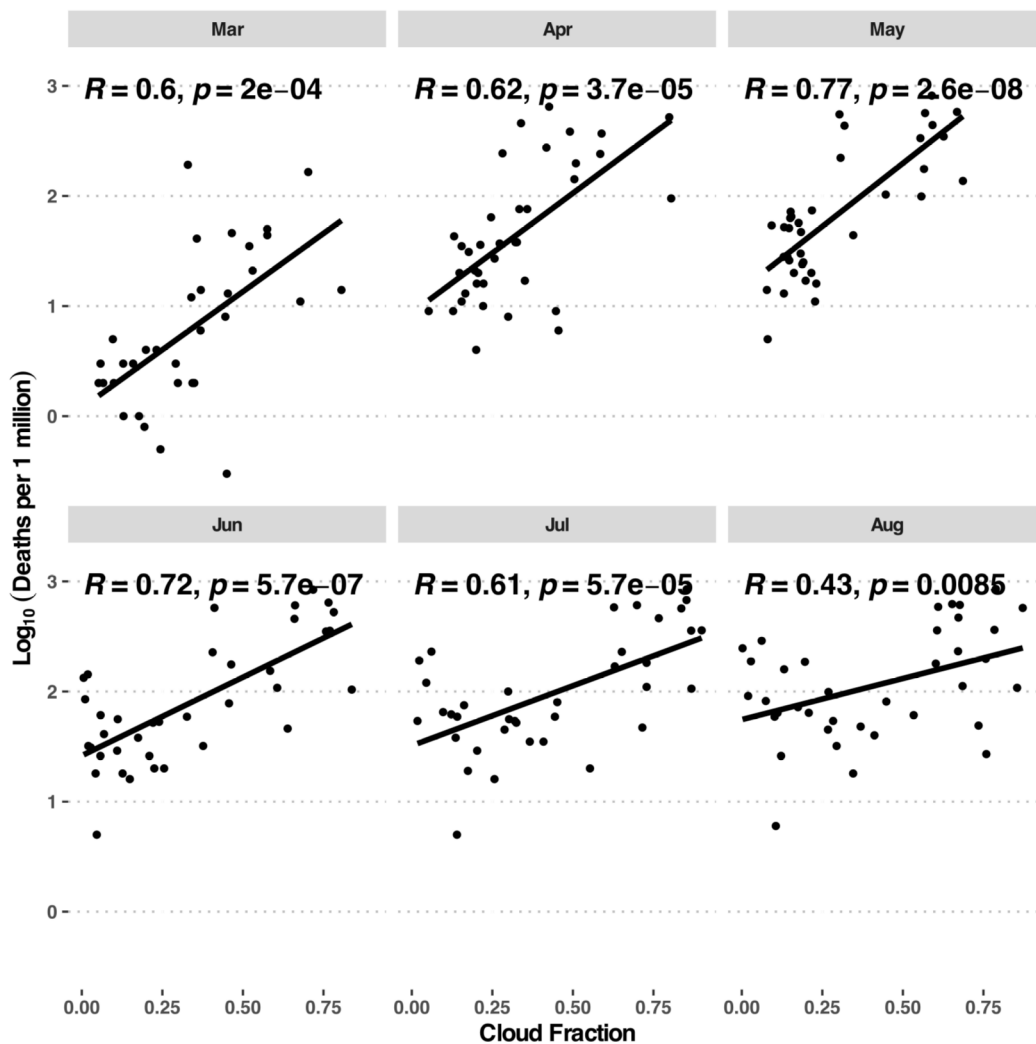

Figure 3. Monthly correlation between mortality and cloudiness. The data points are the values for all European countries included in the study for each month of the interval studied (March – August 2020). Cloudiness is expressed as the cloud fraction, which ranges between 0.0 (completely sunny sky) and 1.0 (clouds completely obscure the sun).

The dataset shows a positive and statistically significant correlation between the mortality rate (evaluated at the end of each month) and the overall cloudiness in that entire month (Pearson's  $r$  listed in each monthly panel, Figure 3).

The linear models that fit the data shown in Figure 3 are presented in Table 2. In continental Europe, from the beginning of the epidemic, approximately 34% to 58% of the variance in COVID-19 mortality/million appears to be predicted by the cloudiness fraction of the sky in the March – July interval, except that in August it was ~15%. All the models passed the quality criteria listed in the Calculation section; the residuals of all the models appear to be homoscedastic, the Breusch-Pagan test yielding  $p$ -values  $> 0.5$ . Each model passed a Durbin-Watson test for the autocorrelation of disturbances ( $d$ -statistics = 1.78...2.16,  $p$ -values  $> 0.2$ ).

*Mortality vs. Insolation over time*

For the dataset analysed we found no consistent correlation between the insolation and mortality in the month-by-month analysis. The Pearson's  $r$  values were negative (with the exception of March) but the models did not pass the stringent criteria defined in the Calculation section.

#### 4. Mortality vs. Latitude

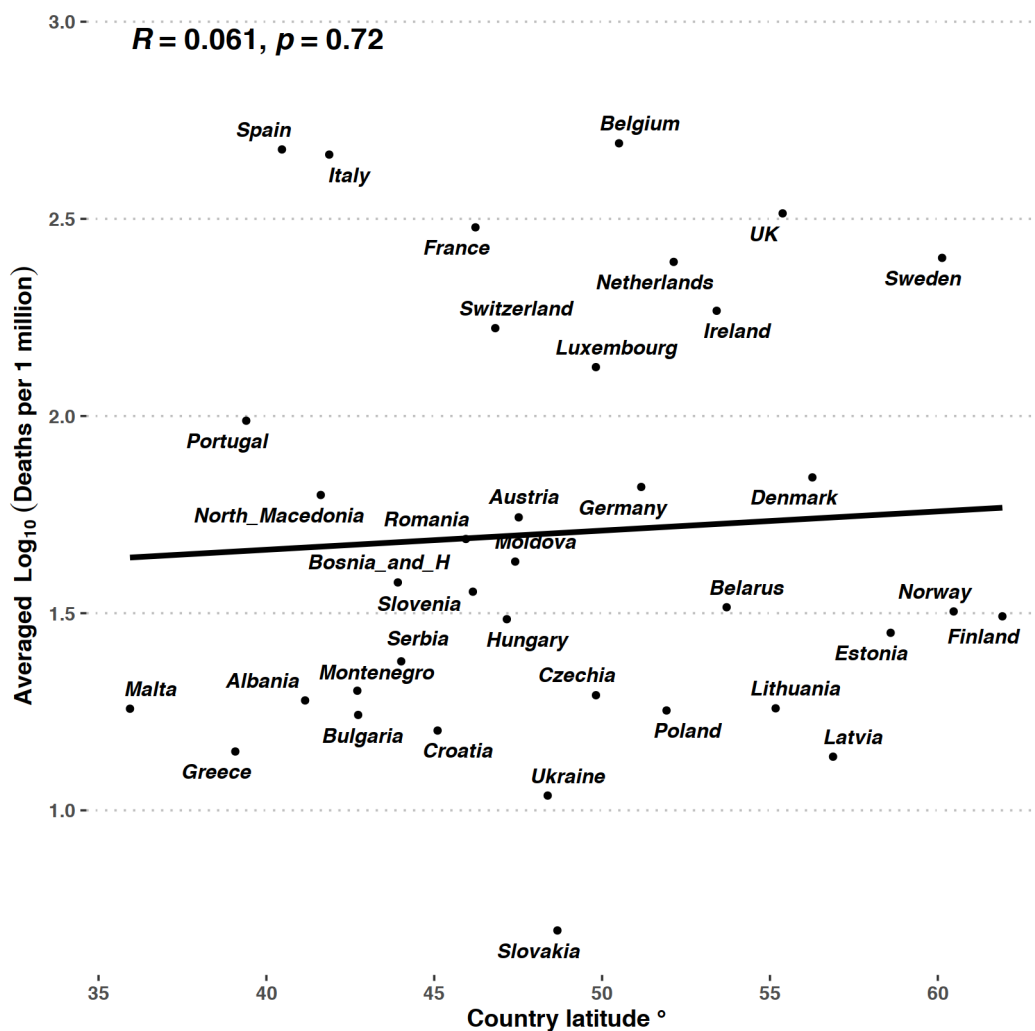

Figure 4. COVID-19 mortality and latitude of the European countries. No correlation found; the data points are the averaged mortality values for all European countries included in the study during March – August 2020.

The dataset (Figure 4) shows no correlation between the mortality rate and the latitude of the European countries for the entire interval studied (Pearson's  $r(35)=.06$ ,  $P=0.72$ ). We used the "country centroid" [21] latitude as the single number that defined the latitude of a country (as discussed in the Methods section).

## *Discussion*

Contrary to some previously reported results (for example [2,5]) we did not find a correlation between latitude and mortality in the studied European countries. This result is possibly because we used the rather stringent centroid definition of the coordinates of countries, rather than a broad geographical area [2] or the coordinates of the capitals [1].

We also found a very low correlation (and negative) between the measured amount of sunlight and mortality that was not consistent month-by-month. This result tends to support the previously published idea that a greater amount of sunlight might have some beneficial effects [29]. However the lack of month-by-month consistency and the low quality of the regression model suggests that the absolute amount of sunlight does not seem to have an impact on mortality.

Together, these two results seem to suggest that the mortality-vitamin D hypothesis (lower sunlight at higher latitudes leads to lower vitamin D levels, which leads to higher mortality) is perhaps incomplete. As a note of interest, other studies found that serum vitamin D correlates stronger with skin tone than with latitude (higher melanin content effectively prevents UV photons from initiating synthesis); see for example Åkeson et al. [30] for a study of vitamin D variation at a single latitude (Sweden), Martin et al. [31] for a general meta-analysis, and a review of vitamin D and COVID-19 [32].

Unexpectedly, we found that the cloudiness in a month (the monthly averaged cloud fraction) has the strongest positive correlation with COVID-19 mortality. This has been, to the best of our knowledge, unreported up to now.

We suggest the following possible explanations for this unexpected finding:

*1) Heavy cloudiness is linked with colder outdoor surfaces, which might aid virus survival*

A higher cloud cover quickly cools down the outdoor surfaces, especially at lower latitudes [33]. Colder surfaces facilitate the survival of SARS-Cov-2 [34]. As observed by Heneghan & Jefferson [35], the risk of incidence was higher in days with lower temperature (citing a study of a previous SARS epidemic by Lin et al, 2005 that observed an 18-fold increase in incidence in lower temperature days than in higher temperature days [36]); the plausible increase in actual incidence might thus lead to an increased number of deaths. As an easy-to-spot example for this unexpected finding, in the spring of 2020 Spain was cloudier than Norway (see Supplementary Material, Figures S.2 and S.1 for cloudiness and mortality charts).

*2) Reduced evaporation rate*

We speculate that in addition to lowering temperature, a cloudy sky may drive down the evaporation rate (via two mechanisms: lower solar energy reaching the ground and perhaps by increasing the relative air humidity). This might favour the stabilization of the infectious droplets and enhance viral propagation (as suggested by Sajadi [2]). This seems to be supported by the evidence that coronaviruses survive better in colder environments but contradicts the finding that higher humidity impairs the transmission [3]. This is highly speculative because in this dataset we could not check for actual humidity in the atmosphere (and to further complicate the interaction, we note that rainy clouds do increase the humidity).

### *3) Moderate pollution may be linked to both cloudiness and mortality*

Even moderate pollution in the atmosphere helps clouds form [37], and it was also previously found that airborne pollution was linked to worse outcomes for the COVID-19 patients (see for example [38] for documented pollution effects in Italy; other similar studies are currently under review). Therefore, it might be that cloudiness data could be a proxy for pollution data (which is not available for all countries).

### *4) Behavioural changes due to cloudiness*

We suggest that an additional simple hypothesis is that overly cloudy weather (a higher cloud fraction) might change behavioural choices at large scale, nudging people to spend more time indoors rather than outdoors. It was suggested that spending more time in closed environments facilitates the secondary transmission of COVID-19, thus driving up the rate of infections (Nishiura et al., 2020, under review). This explanation seems to be consistent with the observation that living in overcrowded conditions is associated with poorer outcomes [8] and with the observation that some other environmental factors are at play in addition to the lack of sun-induced vitamin D synthesis [9].

The results show a difference in the relationships of COVID-19 deaths to cloud fraction versus solar radiation. This could perhaps be explained by a higher net amount of infrared radiation that reaches the ground surface when higher clouds are present compared with the presence of lower clouds [39,40] (we thank an anonymous reviewer for this insight). Our study could not distinguish between the types of clouds constituting the cloud fraction.

We are aware that this study has limitations: we did not investigate the precipitation rate, wind velocity, air pressure, air pollution and density (these are factors that are under scrutiny for their possible impact on COVID-19 epidemiology). We acknowledge that our observational retrospective study is limited: temporal autocorrelation cannot be excluded over longer periods of time. The possibility of spatial autocorrelation was not researched by this study. Cloudiness might be a confounding factor in the previous studies that related vitamin D synthesis to latitude and sunlight. The authors support the current guidelines that in patients with vitamin D deficiency this should be treated irrespective of any link with respiratory infections. We are also aware that different countries took different governmental responses to the COVID-19 crisis, which has led to different epidemiological outcomes. Last, we urge the reader not to extrapolate these results because we only investigated these variables in 37 European countries, not in the entire world. Additionally, this investigation was time-limited for 6 months; the story is developing, and we wait to see what is the impact of an entire seasonal cycle. We plan to update the analysis as new data become available (see Data Availability Statements below). We hope that these results will bring a warning about the possible impact of extended cloudiness on COVID-19 transmission.

## **Conclusions**

The data from the European continent in the spring-summer of 2020 suggest that the atmospheric cloudiness over a longer period (i.e., a month) seems to explain about a third of the variance of coronavirus (COVID-19) mortality; a higher degree of sky cloudiness in a month seems to be correlated with an increased mortality rate in that month. This knowledge

might help advise public health policies related to COVID-19 mitigation and control; we suggest increased vigilance and increased frequency of sanitation of outdoor high-risk surfaces during cloudy weather.

## **Acknowledgements**

Author contribution: O.S. and A.I. jointly wrote the text, O.S. provided clinical background expertise, A.I. performed the formal analysis, and V.B. assisted with data curation and storage. We gratefully thank Prof. Constanța Ganea, Dr. Octavian Călinescu and Dr. Marius-Cristian Frunză for careful reading of the manuscript and valuable insights and suggestions.

## **Financial support**

This research received no specific grant from any funding agency, commercial or not-for-profit sectors.

## **Declaration of interest**

Conflicts of Interest: None.

## **Data Availability Statements**

The data that support the findings of this study are openly available [16,19–22]. We made available the data analysed in this study at the Zenodo open-access repository (<https://doi.org/10.5281/zenodo.4266757>) and plan to update it as new raw data become available.

## References

1. Rhodes J, et al. COVID-19 mortality increases with northerly latitude after adjustment for age suggesting a link with ultraviolet and vitamin D. *BMJ Nutrition, Prevention and Health* BMJ, 2020; 3: 118–120.
2. Sajadi MM, et al. Temperature and latitude analysis to predict potential spread and seasonality for COVID-19. *SSRN Electronic Journal Elsevier BV*, 2020; Published online: 2020.doi:10.2139/ssrn.3550308.
3. Casanova LM, et al. Effects of air temperature and relative humidity on coronavirus survival on surfaces. *Applied and Environmental Microbiology American Society for Microbiology*, 2010; 76: 2712–2717.
4. Ma Y, et al. Effects of temperature variation and humidity on the death of COVID-19 in Wuhan, China. *Science of The Total Environment Elsevier BV*, 2020; 724: 138–226.
5. Whittemore PB. COVID-19 fatalities, latitude, sunlight, and vitamin D. *American Journal of Infection Control Elsevier BV*, 2020; 48: 1042–1044.
6. Ebadi M, Montano-Loza AJ. Perspective: improving vitamin D status in the management of COVID-19. *European Journal of Clinical Nutrition Springer Science and Business Media LLC*, 2020; 74: 856–859.
7. Merzon E, et al. Low plasma 25(OH) vitamin D level is associated with increased risk of COVID-19 infection: an Israeli population-based study. *The FEBS Journal* 2020; 287: 3693–3702.
8. Raisi-Estabragh Z, et al. Greater risk of severe COVID-19 in Black, Asian and Minority Ethnic populations is not explained by cardiometabolic, socioeconomic or behavioural factors, or by 25(OH)-vitamin D status: study of 1326 cases from the UK Biobank. *Journal of Public Health Oxford University Press (OUP)*, 2020; 42: 451–460.
9. Hastie CE, et al. Vitamin D concentrations and COVID-19 infection in UK Biobank. *Diabetes and Metabolic Syndrome: Clinical Research Reviews Elsevier BV*, 2020; 14: 561–565.
10. Liou KN. An introduction to atmospheric radiation; Chapter 2, Section 2.3, Distribution of Solar Insolation. 2nd ed. Amsterdam: Academic Press, 2002.
11. Douglass DH, Clader BD. Climate sensitivity of the Earth to solar irradiance. *Geophysical Research Letters American Geophysical Union (AGU)*, 2002; 29: 33–1–33–4.
12. Lean J, Rind D. Climate forcing by changing solar radiation. *Journal of Climate American Meteorological Society*, 1998; 11: 3069–3094.
13. Frederick JE, Steele HD. The transmission of sunlight through cloudy skies: an analysis based on standard meteorological information. *Journal of Applied Meteorology American Meteorological Society*, 1995; 34: 2755–2761.
14. Jacovides CP, Steven MD, Asimakopoulos DN. Spectral solar irradiance and some optical properties for various polluted atmospheres. *Solar Energy Elsevier BV*, 2000; 69: 215–227.

15. Frederick JE, Erlick C. The attenuation of sunlight by high-latitude clouds: spectral dependence and its physical mechanisms. *Journal of the Atmospheric Sciences American Meteorological Society*, 1997; 54: 2813–2819.
16. Worldometers.info. COVID-19 coronavirus pandemic. Dover, Delaware, U.S.A.: Worldometers, 2020(<https://www.worldometers.info/coronavirus/#countries>). Accessed 1 September 2020.
17. Internet archive. Wayback machine. 300 Funston Ave, San Francisco, CA 94118, 2020(<https://web.archive.org/>). Accessed 2 September 2020.
18. Das C. Death certificates in Germany, England, The Netherlands, Belgium and the USA. *European Journal of Health Law* 2005; 12: 193–211.
19. Stockli R. Cloud fraction (1 month). NASA Goddard Space Flight Center, Greenbelt, MD 20771 USA: NASA's Earth Observatory, MODIS Atmosphere Science Team, 2020([https://neo.sci.gsfc.nasa.gov/view.php?datasetId=MODAL2\\_M\\_CLD\\_FR](https://neo.sci.gsfc.nasa.gov/view.php?datasetId=MODAL2_M_CLD_FR)). Accessed 2 September 2020.
20. Allen J. Solar insolation (1 month). NASA Langley Research Center, Hampton, VA 23681, USA: NASA's Earth Observatory, CERES / FLASHFlux team, 2020([https://neo.sci.gsfc.nasa.gov/view.php?datasetId=CERES\\_INSOL\\_M](https://neo.sci.gsfc.nasa.gov/view.php?datasetId=CERES_INSOL_M)). Accessed 1 September 2020.
21. Google Developers. Dataset publishing language: country centroids. Google LLC, 2020([https://developers.google.com/public-data/docs/canonical/countries\\_csv](https://developers.google.com/public-data/docs/canonical/countries_csv)). Accessed 5 September 2020.
22. Terp S. Bounding boxes for countries. The Hague, Netherlands: Centre for Humanitarian Data (CHD), 2015(<https://data.humdata.org/dataset/bounding-boxes-for-countries>). Accessed 5 September 2020.
23. R Core Team. R: a language and environment for statistical computing. Vienna, Austria: R Foundation for Statistical Computing, 2020.
24. Wickham H, et al. Welcome to the tidyverse. *Journal of Open Source Software* 2019; 4: 1686.
25. Wickham H. *Ggplot2: elegant graphics for data analysis*. New York: Springer-Verlag, 2016.
26. Hlavac M. *Stargazer: well-formatted regression and summary statistics tables*. Bratislava, Slovakia: Central European Labour Studies Institute (CELSI) Reference manual, 2018.
27. Hijmans RJ. *Raster: geographic data analysis and modeling*. R package version 3.3-13 Reference manual, 2020.
28. Stubenrauch CJ, et al. Assessment of global cloud datasets from satellites: project and database initiated by the GEWEX Radiation Panel. *Bulletin of the American Meteorological Society American Meteorological Society*, 2013; 94: 1031–1049.

29. Asyary A, Veruswati M. Sunlight exposure increased Covid-19 recovery rates: A study in the central pandemic area of Indonesia. *Science of The Total Environment* Elsevier BV, 2020; 729Published online: August 2020.doi:10.1016/j.scitotenv.2020.139016.
30. Karlsland Åkeson P, et al. Serum vitamin D depends less on latitude than on skin color and dietary intake during early winter in Northern Europe. *Journal of Pediatric Gastroenterology and Nutrition* Ovid Technologies (Wolters Kluwer Health), 2016; 62: 643–649.
31. Martin CA, Gowda U, Renzaho AMN. The prevalence of vitamin D deficiency among dark-skinned populations according to their stage of migration and region of birth: A meta-analysis. *Nutrition* Elsevier BV, 2016; 32: 21–32.
32. Joseph Lee, Oliver van Hecke, Nia Roberts. Vitamin D: A rapid review of the evidence for treatment or prevention in COVID-19. Radcliffe Observatory Quarter, Oxford OX2 6GG, United Kingdom: Centre for Evidence-Based Medicine, Nuffield Department of Primary Care Health Sciences, 2020(<https://www.cebm.net/covid-19/vitamin-d-a-rapid-review-of-the-evidence-for-treatment-or-prevention-in-covid-19/>). Accessed 7 November 2020.
33. Sun B, et al. Temporal changes in the observed relationship between cloud cover and surface air temperature. *Journal of Climate* American Meteorological Society, 2000; 13: 4341–4357.
34. Riddell S, et al. The effect of temperature on persistence of SARS-CoV-2 on common surfaces. *Virology Journal* Springer Science and Business Media LLC, 2020; 17Published online: October 2020.doi:10.1186/s12985-020-01418-7.
35. Heneghan C, Jefferson T. Effect of latitude on COVID-19. Radcliffe Observatory Quarter, Oxford OX2 6GG, United Kingdom: Centre for Evidence-Based Medicine, Nuffield Department of Primary Care Health Sciences, 2020(<https://www.cebm.net/covid-19/effect-of-latitude-on-covid-19/>). Accessed 24 September 2020.
36. Lin K, et al. Environmental factors on the SARS epidemic: air temperature, passage of time and multiplicative effect of hospital infection. *Epidemiology and Infection* Cambridge University Press (CUP), 2005; 134: 223–230.
37. Jiang JH, et al. Contrasting effects on deep convective clouds by different types of aerosols. *Nature Communications* Springer Science and Business Media LLC, 2018; 9Published online: September 2018.doi:10.1038/s41467-018-06280-4.
38. Coker ES, et al. The effects of air pollution on COVID-19 related mortality in Northern Italy. *Environmental and Resource Economics* Springer Science and Business Media LLC, 2020; 76: 611–634.
39. Pfister G, et al. Cloud coverage based on all-sky imaging and its impact on surface solar irradiance. *Journal of Applied Meteorology* 2003; 42: 1421–1434.
40. Matuszko D. Influence of the extent and genera of cloud cover on solar radiation intensity. *International Journal of Climatology* 2012; 32: 2403–2414.



## Tables

Table 1. The statistics of the linear model of the overall averaged mortality vs. averaged cloudiness.

| <i>Dependent variable:</i>                  |                                               |
|---------------------------------------------|-----------------------------------------------|
| Averaged Log <sub>10</sub> (Deaths/million) |                                               |
| Averaged Cloud_Fraction                     | 1.896***<br>(0.257)<br>t = 7.370<br>p = 0.000 |
| Constant                                    | 1.033***<br>(0.106)<br>t = 9.723<br>p = 0.000 |
| Observations                                | 37                                            |
| R <sup>2</sup>                              | 0.608                                         |
| Adjusted R <sup>2</sup>                     | 0.597                                         |
| Residual Std. Error                         | 0.334 (df = 35)                               |
| F Statistic                                 | 54.317*** (df = 1; 35) (p = 0.000)            |
| <i>Note:</i>                                | *p<0.1; **p<0.05; ***p<0.01                   |

Table 2. The statistics of the linear models of monthly mortality vs. cloudiness.

| <i>Dependent variable:</i>         |                                             |                                               |                                                |                                                |                                                |                                                |
|------------------------------------|---------------------------------------------|-----------------------------------------------|------------------------------------------------|------------------------------------------------|------------------------------------------------|------------------------------------------------|
| Log <sub>10</sub> (Deaths/million) |                                             |                                               |                                                |                                                |                                                |                                                |
|                                    | Mar                                         | Apr                                           | May                                            | Jun                                            | Jul                                            | Aug                                            |
|                                    | (1)                                         | (2)                                           | (3)                                            | (4)                                            | (5)                                            | (6)                                            |
| Cloud_Fraction                     | 2.113***<br>(0.501)<br>t = 4.217<br>p <.001 | 2.174***<br>(0.460)<br>t = 4.724<br>p <.001   | 2.293***<br>(0.321)<br>t = 7.136<br>p <.001    | 1.424***<br>(0.233)<br>t = 6.101<br>p <.001    | 1.088***<br>(0.237)<br>t = 4.580<br>p <.001    | 0.747***<br>(0.268)<br>t = 2.787<br>p <.001    |
| Constant                           | 0.075<br>(0.195)<br>t = 0.384<br>p = 0.704  | 0.939***<br>(0.170)<br>t = 5.536<br>p = <.001 | 1.150***<br>(0.112)<br>t = 10.247<br>p = <.001 | 1.417***<br>(0.101)<br>t = 14.002<br>p = <.001 | 1.508***<br>(0.124)<br>t = 12.176<br>p = <.001 | 1.745***<br>(0.134)<br>t = 13.069<br>p = <.001 |
| Observations                       | 33                                          | 37                                            | 37                                             | 37                                             | 37                                             | 37                                             |
| R2                                 | 0.365                                       | 0.389                                         | 0.593                                          | 0.515                                          | 0.375                                          | 0.182                                          |
| Adjusted R2                        | 0.344                                       | 0.372                                         | 0.581                                          | 0.502                                          | 0.357                                          | 0.158                                          |
| Residual Std.<br>Error             | 0.563<br>(df = 31)                          | 0.491<br>(df = 35)                            | 0.372<br>(df = 35)                             | 0.391<br>(df = 35)                             | 0.418<br>(df = 35)                             | 0.454<br>(df = 35)                             |
| F Statistic                        | 17.784***<br>(df = 1; 31)<br>(p <.001)      | 22.312***<br>(df = 1; 35)<br>(p <.001)        | 50.917***<br>(df = 1; 35)<br>(p <.001)         | 37.224***<br>(df = 1; 35)<br>(p <.001)         | 20.976***<br>(df = 1; 35)<br>(p <.001)         | 7.765***<br>(df = 1; 35)<br>(p <.001)          |

*Note:* \*p<0.1; \*\*p<0.05; \*\*\*p<0.01
